1 **Difference in hoof conformation between shod and barefoot-**  
2 **managed hooves**

3 J.N. DE KLERK<sup>\*</sup>, BVetMed (Hons) MSTA<sup>H</sup> MRCVS

4 \*E-mail for correspondence: johardyvet@gmail.com

5

6 **Authors' declaration of interests**

7 No competing interests have been declared.

8

9 **Ethical animal research**

10 Ethical approval was granted by the Royal Veterinary College on 19<sup>th</sup> March 2013 (Reference Number  
11 2013/R62).

12

13 **Source of funding**

14 The research was sole funded by the author.

15

16 **Acknowledgements**

17 The author wishes to acknowledge Mr Neil Nevison for constructing a photographic rig to the author's design and  
18 Ms Jenny Butler-Smith, Miss Emma Delpont, Mrs Deborah Mead, Mrs Kirsty Stuart, Mrs Diane Goddard, Mrs  
19 Shirley Exall, Miss Eva Cox, Mrs Marianne Cox, Ms Sarah Mollett, Miss Lisa Housden, Miss Harriet Bradford,  
20 Mrs Auriol Thorne, Ms Bevni Lyons, Miss Emma Burston, Mr Wayne Upton, Mr Jack Hopson, Ms Teresa Mallia,  
21 Ms Teresa Watson, Miss Jo Ricey and Miss Natasha Crawley for aiding in the recruitment of horses for the  
22 study.

23

24 **Authorship**

25 J.N. de Klerk contributed to the study design, data collection, analysis and writing of the study.

26

27

28

29

## 30 **Abstract**

31

32 **Reasons for performing the study:** Hoof conformation is linked to biomechanics of the hoof and injury  
33 occurrence. There is no scientific data if conformation differs between shod and barefoot-managed hooves.

34 **Objectives:** To investigate if and how shod and barefoot hooves differ in conformation.

35 **Study design:** Retrospective cohort study.

36 **Methods:** Standardised lateral, dorsopalmar/dorsoplantar and solar photographs of 98 shod and 69 barefoot-  
37 managed hooves were included. Thirty-six of the barefoot horses were farrier-managed, 33 were podiatrist-  
38 managed. Length and angular measurements produced nine conformation parameters; dorsopalmar/plantar  
39 balance, solar symmetry, toe angle, heel angle, heel/toe angle difference, heel width, splaying index, flaring index  
40 and frog size.

41 **Results:** Barefoot hooves showed significantly fewer underrun heels, steeper heel angles, wider heels,  
42 increased splaying, increased flaring and larger frog size compared to hooves of shod horses. Solar symmetry  
43 showed a significant difference in front hooves but not hind hooves ( $P=0.038$ ,  $P=0.104$ ) and toe angle was not  
44 significantly different ( $P=0.368$ ,  $P=0.425$ ). There was no significant difference in the conformation of barefoot  
45 farrier and podiatrist-managed front hooves, however there was a significant difference in the hind hooves:  
46 farrier-managed hooves had longer frogs and shorter toes, compared to podiatrist-managed hooves.

47 **Conclusions:** The significant differences in hoof conformation found should be considered when managing the  
48 individual horse, since hoof conformation affects loading of the internal structure of the hoof and hence influences  
49 aetiopathogenesis of hoof pathology.

50

51 **Keywords:** horse; barefoot; shoes; hoof, conformation; angles

52

## 53 **Introduction**

54

55 Horses are shod for comfort over all surfaces, particularly hard or rough terrains, and to prevent mechanical  
56 damage to the hoof capsule, such as splitting, bruising, cracking and excessive wear [1]. Good shoeing  
57 technique ensures suitable mediolateral and dorsopalmar/dorsoplantar hoof balance and provides support for  
58 internal structures. Shoes can also influence load distribution, for example by fitting extensions to address  
59 imbalances [2]. Many acknowledge that horseshoes provide support and can prevent or improve many hoof-  
60 related pathologies.

61

62 Some parties challenge shoeing, believing that shoes are cruel [3] and cause discomfort and lameness. In the  
63 late 20<sup>th</sup> century, a “natural” barefoot hoof management was introduced collaboratively between a veterinarian  
64 and a farrier [4]. However, these concepts were considered radical, as many horses endured hoof pain and sub-  
65 solar abscess formation during the post-shoe removal transition period. Now, less radical trimming programmes  
66 have been introduced, advocated by the Equine Podiatry Association and the Institute of Applied Equine Podiatry  
67 [5].

68

69 Trimming and shoeing influences hoof conformation which affects the loading of the structures within the hoof  
70 and higher up the limb. One degree change in solar angle induces a 4% change in the strain of the digital flexor  
71 tendon and hence pressure experienced by the navicular bone [6]. These findings were verified by the results of  
72 a study where hoof conformation differed significantly between lame horses suffering from different lesions in the  
73 hoof [7]. Hoof growth and management influences locomotor biomechanics [8, 9] and hoof conformation [10].

74 The latter study investigated how hoof conformation changed over a 16-month period once implementing  
75 standardised barefoot trimming. This work demonstrated that the toe increased in length, the heel angle  
76 steepened and that the frog contact area increased significantly [10]. These changes were considered beneficial,  
77 particularly the raised heel height. A 5% increase in heel angle results in significantly less stress and  
78 displacement of distal limb structures [11]. Furthermore, an increased contact-area of the frog aids the hoof's  
79 haemodynamic mechanism by assisting healing, growth and energy dissipation [12, 13].

80

81 There is limited scientific evidence about how hoof management influences hoof conformation. This study  
82 compared hoof conformation of horses managed barefoot and shod and hypothesised there would be a  
83 significant difference in hoof conformation between the two groups. In particular:

- 84 1) Lateromedial asymmetry, e.g. splaying, is more common in barefoot-managed horses.  
85 2) Dorsopalmar/plantar hoof imbalance such as under-run heels, boxy hooves and long toes are more common  
86 in shod horses  
87 3) Barefoot horses have wider, larger frogs and larger width between heels than shod horses

88 In the UK, trimming of hooves is not regulated and is not limited to farriers, but is routinely performed by  
89 podiatrists. Training of farriers and podiatrists differs and we hypothesise:

- 90 4) There will be a significant difference in hoof conformation between barefoot-managed hooves managed by  
91 farriers compared to podiatrists.

92

## 93 **Materials and Methods**

94

### 95 *Horses*

96 Ninety-eight shod and 69 barefoot hooves were included in the study from 46 horses. Twenty-four horses were  
97 geldings and 22 were mares. All horses included in the study were from a general leisure horse population,  
98 regularly exercised, but not in competition work or heavy training routines. The horses were between 5 and 22  
99 years old with a mean $\pm$ SD age of 12.1 $\pm$ 4.8 years. Heights ranged from 12.3hh to 17.3hh. All horses were  
100 maintained exclusively either shod or barefoot for more than 18 months before the study and on a hoof  
101 management regimen of either shoeing with standard shoes or kept barefoot with trimming performed every 5-7  
102 weeks in both groups. A farrier or podiatrist who had been working full time for no less than 2 years, had received  
103 certified training in their area of work, and had undergone continual professional development since being  
104 awarded their degree, performed the shoeing and hoof trimming. The horses were split into 2 groups; shod,  
105 barefoot and the latter was further subdivided in farrier-managed and podiatrist-managed horses (36 farrier-  
106 managed, 33 podiatrist-managed).

107

### 108 *Conformation Measurements*

109 Frontal, lateral and solar views were obtained from each front and hind hoof within two days of shoeing or  
110 trimming using a digital camera (Samsung WB250): Frontal and lateral photographs were obtained centring on  
111 the centre of the hoof with the camera set at a 30cm distance away using of a custom-made rig. For the solar  
112 photograph, the camera was set to be 30cm away from the apex of the frog. Linear and angular measurements  
113 were performed in Image J (<http://rsbweb.nih.gov/ij/links.html>) (table 1). Additionally, circumference at the  
114 coronary band (cm) and circumference of the sole (cm) were measured with a measuring tape. Type of horse-  
115 build based on height, weight and stature (light-weight/medium-weight/heavy-weight), gender, age and exercise  
116 regimen was also recorded.

117

118 A repeatability assessment of the measurement technique was performed by measuring each parameter twice  
119 and calculating the limits of agreement [14, 15] (table 2).

120

121

122

123

124

125 *Data analysis*

126 Data were tested for normality using the Shapiro-Wilk test and conformation parameters were compared between  
127 the shod and barefoot-managed hooves and between farrier and podiatrist-managed hooves using a T-test or  
128 Mann Whitney U test depending on the distribution of the individual conformation parameter. Horses were also  
129 grouped according to their stature and stature-type was also included in the analysis using a Kruskal-Wallis or  
130 One Way ANOVA test to assess if it was a confounding factor. When analysing stature-type, it was found that it  
131 was a confounding factor for dorsopalmar/dorsoplantar balance ( $P=0.004$ ), heel angle ( $P=0.013$ ), and frog size  
132 ( $P=0.001$ ) and so it was ensured that the same ratio of light-weight, medium-weight and heavy-weight horses  
133 were included in each group for further statistical analysis. Left and right hooves were also analysed to ensure  
134 the values could be combined. For all parameters, there was no statistical significance, so left and right hooves  
135 were combined. All parameters were analysed in SPSS (IBM, version 22.0.0.1). P was set at 0.05.

136

137 **Results**

138

139 *Comparison of conformation parameters of shod and barefoot-managed horses*

140 Table 3 shows the hoof conformation parameters of the hooves measured in this study for shod and barefoot-  
141 managed hooves.

142 The toe angle in front and hind hooves did not differ significantly between shod and barefoot-managed hooves.

143 The heel angle however differed significantly between the two groups in both front and hind hooves. Shod  
144 hooves had a shallower heel angle compared to barefoot-managed hooves. In front hooves, the range of toe  
145 angle was much greater in shod hooves than in the barefoot hooves and the heel angle range was much greater  
146 for shod hooves in both, front and hind feet. There was a significant difference between the two groups in the  
147 difference in toe and heel angles in both front and hind hooves. Shod hooves had larger differences between toe  
148 and heel angles than barefoot hooves. There was a high prevalence of under-run heels, defined by a difference  
149 of more than 5 degrees [16], observed in both groups. 75.5% of hooves were under-run in the shod group and  
150 40.5% were under-run in the barefoot group.

151 Barefoot-managed hooves showed a significantly greater heel width compared to shod hooves in front and hind.

152 There was a significant difference in dorsopalmar/dorsoplantar balance between both groups for both front and  
153 hind hooves with barefoot hooves showing significantly shorter toes compared to shod hooves.

154 For both hoof management regimens, the hooves were on average wider laterally. In the front hooves, barefoot  
155 hooves were significantly more asymmetrical compared to shod hooves, but no significant difference in  
156 asymmetry was found between the two groups in the hind hooves.

157 There was a significant difference between hoof management regimens for splaying and flaring in both front and  
158 hind hooves with barefoot hooves being more splayed and flared than shod hooves.

159 There was a significant difference between hoof management regimens for frog area in both front and hind  
160 hooves with barefoot hooves having significantly larger frogs than shod hooves.

161

162 *Comparison of conformation parameters of barefoot hooves managed by a podiatrist and managed by a farrier*

163 Table 4 shows the difference in hoof conformation parameters of barefoot hooves managed by a farrier  
164 compared to a podiatrist.

165 There was no significant difference between farrier and podiatrist-managed front and hind hooves for heel angle,  
166 solar symmetry, toe angle, difference in toe and heel angles, heel width, splaying, flaring or frog size.

167 There was no significant difference between farrier and podiatrist-managed front hooves for dorsopalmar  
168 balance, however there was a significant difference in the hind hooves. Farrier-managed hooves had longer frogs  
169 and shorter toes, compared to podiatrist-managed hooves.

170

171

## 172 Discussion

173

174 This study showed that some hoof conformation parameters differed significantly between shod and barefoot-  
175 managed hooves and between farrier and podiatrist-managed barefoot hooves.

176

177 In concordance to other recent studies on hoof conformation, it was found that hooves were wider laterally than  
178 medially in the forelimbs [17] and that hooves were more asymmetrical without shoes in the hindlimbs [18]. In  
179 agreement with previous findings there was a relationship between management regime and palmar angle,  
180 dorsal to palmar angle ratio, lateral heel height, sole length, sole length to width ratio, medial hoof width and solar  
181 symmetry [17]. Traditionally, in past literature, hoof angles were described to be around 45° in the forelimb and  
182 55° in the hindlimb [1], which would suggest the results of this study were slightly steep in the forelimb and  
183 slightly shallow in the hindlimb, however this study's results are consistent with other studies conducted in the  
184 past year where hoof angles were on average 50.3° in the forelimb [17] and 51.52°-52.16° in the hindlimb [18],  
185 suggesting a need to review hoof conformation of the modern domestic horse.

186

187 In the presented study there was no significant difference in toe angle between shod and barefoot-managed  
188 hooves, however the heel angle was significantly shallower in shod hooves compared to barefoot hooves. This  
189 may be due to the fact that these horses were more likely to be managed with shoes or it may be due to the fact  
190 that shoes increase the pressure on the horn in the heel area and over time lead to lowering of the heels. It has  
191 been shown previously that when hooves are managed without shoes, the distal half of the heels migrate  
192 palmarly/plantarly [10], thus increasing heel height. Lower heels are usually associated with a shallower solar  
193 angle of the distal phalanx and it has been shown that for each degree change in angle the strain and thus the  
194 stress on the navicular bone increases [6]. The opposite effect is seen when heel wedges are applied to increase  
195 heel angle, this results in a decrease of navicular bone stress in comparison to flat shoes. The same study  
196 showed that barefoot hooves showed a 14% reduction in the forces acting on the navicular bone, possibly due to  
197 the same mechanism as wedges [19]. Shallower heel angles may progress to under-run heels, which decrease  
198 the capability of the heels to deform under load thereby negatively impacting shock absorption and possibly also  
199 compromising the blood supply to the hoof [20]. This consequently may predispose to hoof pathologies.

200 Hyperextension of the interphalangeal and fetlock joints also occurs with under-run heels, thereby increasing  
201 strain on the deep digital flexor tendon and the navicular bone [21].

202

203 Our study revealed that barefoot horses had more splayed and flared hooves than shod horses, suggesting that  
204 horseshoes might restrict multidirectional expansion of the hoof capsule. Shoes have been shown to decrease  
205 the deformation of the hoof wall during loading, by redistributing irregular strains without compromising hoof  
206 function, thereby protecting against flare [22]. Flare is undesirable in hooves, as it considerably weakens the hoof  
207 wall by bending of horn tubules [23].

208

209 Overall, all hooves in all groups were wider laterally. Previous studies have demonstrated that horses  
210 preferentially land laterally [17, 24] which corresponds to a more splayed, lower lateral and a steeper, higher  
211 medial hoof wall [25]. Slight asymmetry throughout all groups to the lateral side to a degree, is therefore  
212 considered normal. In the presented study there was only a significant difference in solar symmetry between hoof  
213 management regimens for front hooves, with barefoot hooves being more asymmetrical than shod hooves. The  
214 difference between the front and the hind hooves may be attributed to the uneven weight distribution of the horse  
215 with 58% of the weight being loaded on the forelimbs, and 42% loaded on the hindlimbs [26], as a greater  
216 downwards pressure on the hooves may increase lateral splay. Incorrect trimming, pain, or compensation for  
217 poor conformation may result in excessive lateral or medial landing and mediolateral imbalance [27]. Excessive  
218 asymmetry is important to address as it affects rotation, abduction and adduction of the distal interphalangeal  
219 joint [28], thereby potentially predisposing the distal limb to injuries relating to the articular surfaces and collateral  
220 ligaments [28,29], as well as causing chronic heel pain, sheared heels, metacarpophalangeal synovitis and side-  
221 bones [30]. The point at which asymmetry is considered excessive has not been quantified, however in this study  
222 a wider range of asymmetry was observed in barefoot hooves compared to shod hooves. The potential for  
223 barefoot-managed hooves to show more hoof asymmetry and hence for more uneven loading ought to be taken  
224 into account when dealing with those horses.

225

226 Heel width and frog size were both significantly associated with hoof management regimen. Barefoot hooves had  
227 wider heels and larger frogs than shod hooves. A wide heel and large frog is considered an advantageous  
228 feature of the hoof since it increases the load-bearing area, thus reducing stress. An increased area in the  
229 palmar/plantar aspect of the solar dermis could also potentially increase proprioception of the horse during  
230 locomotion, due to the high local concentration of Pacinian corpuscles [31]. It has been suggested that the frog  
231 hypertrophies when it becomes a weight-bearing structure [32]. Barefoot frogs have more stimuli for growth as  
232 they impact the ground, instead of being raised above it like in shod hooves [10]. This is advantageous for the  
233 distal limb as increased frog-ground contact increases blood flow, thereby aiding healing, energy dissipation and  
234 growth [10,12, 13]



235

236 There was a significant difference in hindlimb, but not frontlimb conformation between farrier-managed and  
237 podiatrist-managed barefoot hooves with the farrier-managed horses showing significantly shorter hooves and  
238 longer frogs in the hindlimbs. This may be due to different approaches to trimming hindfeet in particular based on  
239 the different training members of both groups undergo. No significant differences in the frontlimb were observed  
240 despite the proclaimed fundamental difference in approach by the two groups. Further studies on the detailed  
241 differences of the individual training programmes in relation to trimming are necessary to investigate this further.  
242

## 243 Tables

244 **TABLE 1 Conformation parameters included in this study**

| Parameter                           | Unit    | Definition                                                                                                                                                                                                                                               |
|-------------------------------------|---------|----------------------------------------------------------------------------------------------------------------------------------------------------------------------------------------------------------------------------------------------------------|
| <b>Toe Angle</b>                    | degrees | Direct measurement                                                                                                                                                                                                                                       |
| <b>Heel Angle</b>                   | degrees | Direct measurement                                                                                                                                                                                                                                       |
| <b>Difference in angles</b>         | degrees | Toe angle minus heel angle<br><br>A negative number indicates a steeper heel angle and a positive number indicates a shallower heel angle compared to the toe angle. 0° was the gold standard and greater than +5° indicated under-run heels.            |
| <b>Flaring</b>                      | degrees | The average of the lateral angle of deviation and the medial angle of deviation.                                                                                                                                                                         |
| <b>Dorsopalmar(plantar) Balance</b> | %       | Frog length divided by sole length, multiplied by 100                                                                                                                                                                                                    |
| <b>Heel Width</b>                   | %       | Heel width divided by sole width, multiplied by 100                                                                                                                                                                                                      |
| <b>Frog size</b>                    | %       | Frog area divided by sole area, multiplied by 100                                                                                                                                                                                                        |
| <b>Splaying</b>                     | ratio   | Sole circumference plus heel width, divided by coronary band circumference<br><br>A higher figure indicates that the hoof was more splayed.                                                                                                              |
| <b>Solar Symmetry Index</b>         | ratio   | Lateral sole width divided by medial sole width<br><br>These figures represent mediolateral symmetry of the sole over the widest point, where less than 1 indicates the sole is wider medially and greater than 1 indicates the sole is wider laterally. |

245

246 **TABLE 2 Reliability of conformation measurements: 95% limits of agreement for repeat measurements**

| Parameter                             | Lower limit of agreement | Upper limit of agreement |
|---------------------------------------|--------------------------|--------------------------|
| <b>Toe Angle (degrees)</b>            | -0.35                    | 0.40                     |
| <b>Heel Angle (degrees)</b>           | -0.49                    | 0.41                     |
| <b>Medial Wall Angle (degrees)</b>    | -0.51                    | 0.42                     |
| <b>Lateral Wall Angle (degrees)</b>   | -0.55                    | 0.36                     |
| <b>Heel Width (arb. unit)</b>         | -0.52                    | 0.66                     |
| <b>Sole Width (arb. unit)</b>         | -0.91                    | 0.81                     |
| <b>Lateral Sole Width (arb. unit)</b> | -0.66                    | 0.65                     |
| <b>Medial Sole Width (arb. unit)</b>  | -0.68                    | 0.63                     |
| <b>Frog Length (arb. unit)</b>        | -0.58                    | 0.60                     |
| <b>Frog to Toe Length (arb. unit)</b> | -0.83                    | 0.69                     |
| <b>Frog Width (arb. unit)</b>         | -0.52                    | 0.51                     |

247

248 **TABLE 3 Conformation parameters for shod hooves and barefoot hooves for front and hind hooves.**

249 **Mean and standard deviation (SD) are displayed for normally distributed parameters, median and**  
 250 **interquartile range (IQR) are displayed for not-normally distributed parameters; P-value is for comparison**  
 251 **between shod and barefoot-managed hooves.**

| Parameter                                | Condition | Hoof  | Minimum | Maximu<br>m | Median | IQR   | Mean  | SD   | P value |
|------------------------------------------|-----------|-------|---------|-------------|--------|-------|-------|------|---------|
| <b>Toe Angle (degrees)</b>               | Shod      | Front | 43.22   | 58.06       | 50.22  | 4.39  |       |      | 0.368   |
|                                          | Barefoot  | Front | 40.47   | 55.87       | 50.03  | 3.04  |       |      |         |
|                                          | Shod      | Hind  | 42.73   | 62.59       | 50.93  | 4.37  |       |      | 0.425   |
|                                          | Barefoot  | Hind  | 43.19   | 62.31       | 51.88  | 4.78  |       |      |         |
| <b>Heel Angle (degrees)</b>              | Shod      | Front | 22.87   | 57.56       |        |       | 41.65 | 7.34 | <0.001  |
|                                          | Barefoot  | Front | 35.10   | 56.43       |        |       | 45.83 | 5.60 |         |
|                                          | Shod      | Hind  | 14.68   | 51.21       |        |       | 37.21 | 9.62 | <0.001  |
|                                          | Barefoot  | Hind  | 33.02   | 54.46       |        |       | 43.95 | 5.98 |         |
| <b>Difference in toe and heel angles</b> | Shod      | Front | -2.04   | 31.11       | 8.55   | 9.56  |       |      | <0.001  |
|                                          | Barefoot  | Front | -12.30  | 10.37       | 2.55   | 3.59  |       |      |         |
|                                          | Shod      | Hind  | 2.56    | 33.05       | 12.08  | 14.46 |       |      | <0.001  |

|                                     |          |       |       |       |       |       |       |      |        |
|-------------------------------------|----------|-------|-------|-------|-------|-------|-------|------|--------|
| <b>(degrees)</b>                    | Barefoot | Hind  | -2.08 | 16.50 | 5.02  | 6.63  |       |      |        |
| <b>Flaring (degrees)</b>            | Shod     | Front | 0.46  | 12.42 | 4.35  | 3.91  |       |      | <0.001 |
|                                     | Barefoot | Front | 1.92  | 32.15 | 11.33 | 7.28  |       |      |        |
|                                     | Shod     | Hind  | 0.07  | 11.32 | 4.86  | 2.91  |       |      | <0.001 |
|                                     | Barefoot | Hind  | 2.42  | 17.67 | 10.44 | 5.49  |       |      |        |
| <b>Dorsopalmar (plantar)</b>        | Shod     | Front | 57.97 | 72.65 |       |       | 65.71 | 3.46 | 0.038  |
|                                     | Barefoot | Front | 64.31 | 77.62 |       |       | 69.75 | 3.77 |        |
| <b>Balance (%)</b>                  | Shod     | Hind  | 58.23 | 68.69 |       |       | 65.14 | 2.80 | 0.006  |
|                                     | Barefoot | Hind  | 62.07 | 74.88 |       |       | 68.76 | 3.35 |        |
| <b>Heel Width (%)</b>               | Shod     | Front | 38.03 | 62.61 | 49.48 | 7.66  |       |      | <0.001 |
|                                     | Barefoot | Front | 53.41 | 71.46 | 63.08 | 5.79  |       |      |        |
|                                     | Shod     | Hind  | 41.07 | 66.67 | 52.34 | 9.11  |       |      | <0.001 |
|                                     | Barefoot | Hind  | 55.19 | 88.80 | 70.65 | 10.36 |       |      |        |
| <b>Frog size (%)</b>                | Shod     | Front | 12.18 | 23.62 | 16.57 | 3.02  |       |      | <0.001 |
|                                     | Barefoot | Front | 18.50 | 29.29 | 21.92 | 4.06  |       |      |        |
|                                     | Shod     | Hind  | 13.46 | 27.06 | 19.05 | 3.51  |       |      | <0.001 |
|                                     | Barefoot | Hind  | 20.54 | 39.02 | 26.53 | 5.80  |       |      |        |
| <b>Solar Symmetry Index (ratio)</b> | Shod     | Front | 0.88  | 1.14  | 1.03  | 0.06  |       |      | 0.038  |
|                                     | Barefoot | Front | 0.81  | 1.34  | 1.06  | 0.09  |       |      |        |
|                                     | Shod     | Hind  | 0.93  | 1.30  | 1.08  | 0.08  |       |      | 0.104  |
|                                     | Barefoot | Hind  | 0.89  | 1.29  | 1.04  | 0.11  |       |      |        |
| <b>Splaying (ratio)</b>             | Shod     | Front | 1.11  | 1.51  | 1.32  | 0.07  |       |      | 0.001  |
|                                     | Barefoot | Front | 1.27  | 1.51  | 1.39  | 0.11  |       |      |        |
|                                     | Shod     | Hind  | 1.22  | 1.52  | 1.34  | 0.08  |       |      | 0.003  |
|                                     | Barefoot | Hind  | 1.19  | 1.51  | 1.39  | 0.08  |       |      |        |

252

253

254 **TABLE 4 Conformation parameters for barefoot hooves managed by a farrier and barefoot hooves**  
 255 **managed by a podiatrist for front and hind hooves. Mean and standard deviation (SD) are displayed for**  
 256 **normally distributed parameters, median and interquartile range (IQR) are displayed for not-normally**  
 257 **distributed parameters; P-value is for comparison between farrier and podiatrist-managed hooves.**

| Parameter                                                      | Farrier/Po<br>diatrist | Hoof  | Minimum | Maximum | Median | IQR   | Mean  | SD   | P value |
|----------------------------------------------------------------|------------------------|-------|---------|---------|--------|-------|-------|------|---------|
| <b>Toe Angle<br/>(degrees)</b>                                 | Farrier                | Front | 40.47   | 55.87   | 49.76  | 4.49  |       |      | 0.618   |
|                                                                | Podiatrist             | Front | 41.70   | 53.89   | 50.16  | 2.70  |       |      |         |
|                                                                | Farrier                | Hind  | 48.42   | 62.31   | 52.09  | 3.90  |       |      | 0.403   |
|                                                                | Podiatrist             | Hind  | 43.19   | 58.89   | 50.68  | 5.13  |       |      |         |
| <b>Heel Angle<br/>(degrees)</b>                                | Farrier                | Front | 39.64   | 56.43   |        |       | 47.31 | 4.15 | 0.351   |
|                                                                | Podiatrist             | Front | 35.10   | 59.50   |        |       | 45.75 | 4.79 |         |
|                                                                | Farrier                | Hind  | 34.99   | 59.71   |        |       | 46.69 | 6.04 | 0.326   |
|                                                                | Podiatrist             | Hind  | 33.02   | 54.46   |        |       | 44.70 | 6.41 |         |
| <b>Difference in<br/>toe and heel<br/>angles<br/>(degrees)</b> | Farrier                | Front | -12.30  | 7.25    | 2.33   | 3.96  |       |      | 0.318   |
|                                                                | Podiatrist             | Front | -2.57   | 10.37   | 3.55   | 5.13  |       |      |         |
|                                                                | Farrier                | Hind  | -0.35   | 16.50   | 4.64   | 4.78  |       |      | 0.322   |
|                                                                | Podiatrist             | Hind  | -2.08   | 11.69   | 7.97   | 5.49  |       |      |         |
| <b>Flaring<br/>(degrees)</b>                                   | Farrier                | Front | 1.92    | 21.63   | 13.69  | 10.12 |       |      | 1.000   |
|                                                                | Podiatrist             | Front | 7.44    | 32.15   | 11.06  | 4.80  |       |      |         |
|                                                                | Farrier                | Hind  | 2.42    | 17.54   | 9.49   | 8.41  |       |      | 0.126   |
|                                                                | Podiatrist             | Hind  | 6.31    | 17.67   | 11.08  | 3.94  |       |      |         |
| <b>Dorsopalmar(<br/>plantar)<br/>balance (%)</b>               | Farrier                | Front | 53.87   | 77.62   |        |       | 70.20 | 5.61 | 0.080   |
|                                                                | Podiatrist             | Front | 59.50   | 73.04   |        |       | 66.80 | 4.41 |         |
|                                                                | Farrier                | Hind  | 64.35   | 74.88   |        |       | 69.38 | 3.29 | 0.002   |
|                                                                | Podiatrist             | Hind  | 58.36   | 69.97   |        |       | 65.51 | 3.79 |         |
| <b>Heel Width<br/>(%)</b>                                      | Farrier                | Front | 57.83   | 67.69   | 63.24  | 4.63  |       |      | 0.771   |
|                                                                | Podiatrist             | Front | 53.41   | 71.46   | 62.77  | 6.60  |       |      |         |
|                                                                | Farrier                | Hind  | 61.78   | 83.86   | 71.21  | 10.57 |       |      | 0.650   |
|                                                                | Podiatrist             | Hind  | 55.19   | 88.80   | 69.70  | 6.53  |       |      |         |
| <b>Frog size (%)</b>                                           | Farrier                | Front | 19.18   | 29.29   | 23.34  | 2.31  |       |      | 0.135   |

|                                     |            |       |       |       |       |      |  |  |       |
|-------------------------------------|------------|-------|-------|-------|-------|------|--|--|-------|
|                                     | Podiatrist | Front | 18.50 | 26.85 | 21.66 | 2.10 |  |  |       |
|                                     | Farrier    | Hind  | 20.54 | 33.48 | 26.20 | 5.81 |  |  | 0.777 |
|                                     | Podiatrist | Hind  | 21.14 | 39.02 | 26.53 | 5.94 |  |  |       |
| <b>Solar Symmetry Index (ratio)</b> | Farrier    | Front | 0.81  | 1.34  | 1.06  | 0.11 |  |  | 0.589 |
|                                     | Podiatrist | Front | 0.95  | 1.14  | 1.06  | 0.08 |  |  |       |
|                                     | Farrier    | Hind  | 0.94  | 1.29  | 1.03  | 0.11 |  |  | 0.479 |
|                                     | Podiatrist | Hind  | 0.89  | 1.25  | 1.05  | 0.10 |  |  |       |
| <b>Splaying (ratio)</b>             | Farrier    | Front | 1.27  | 1.51  | 1.41  | 0.15 |  |  | 0.759 |
|                                     | Podiatrist | Front | 1.29  | 1.49  | 1.38  | 0.08 |  |  |       |
|                                     | Farrier    | Hind  | 1.19  | 1.51  | 1.37  | 0.10 |  |  | 0.590 |
|                                     | Podiatrist | Hind  | 1.32  | 1.51  | 1.39  | 0.07 |  |  |       |

258

## 259 **References**

260

261 1. Karle A.S., Tank P.H., Vedpathak H.S., Mahida H.K., Shah R.G. & Dhama M.A. (2010) Horseshoeing: An  
 262 Overview. *Vet World* **3**, 148-151

263

264 2. Stiller P. (2002) Pros and cons of barefoot horses. *J Equine Vet Sci* **22**, 91.

265

266 3. Reilly P. T. (2011) The barefoot paradox. *J Equine Vet Sci* **31**, 591-592

267

268 4. Teskey T.G. (2005) The Unfettered Foot: A paradigm of change for equine podiatry. *J Equine Vet Sci* **25**, 77-  
 269 82

270

271 5. La Pierre K.C. (2011) Barefoot Hoof Care – Energizing Holistic Hoof Care, Institute of Applied Equine Podiatry.  
 272 [http://appliedequinepodiatry.org/Barefoot\\_hoof\\_care.html](http://appliedequinepodiatry.org/Barefoot_hoof_care.html). Accessed May 27 2013

273

274 6. Eliashar E., Mcguigan M. P. & Wilson A. M. (2004) Relationship of foot conformation and force applied to the  
 275 navicular bone of sound horses at the trot. *Equine Vet J* **36**, 431–435

276

- 277 7. Holroyd K., Dixon J.J., Mair T., Bolas N., Bolt D.M., David F. & Weller R. (2013) Variation in foot conformation  
278 in lame horses with different foot lesions. *The Vet J* **195**, 361-365  
279
- 280 8. Van Heel M.C.V., Moleman M., Barneveld A., Van Weeren P. R. & Back W. (2005) Changes in location of  
281 centre of pressure and hoof-unrollment pattern in relation to an 8-week shoeing interval in the horse. *Equine Vet*  
282 *J* **37**, 536–540  
283
- 284 9. Moleman M., van Heel M.C., van Weeren P.R. & Back W. (2006) Hoof growth between two shoeing sessions  
285 leads to a substantial increase of the moment about the distal, but not the proximal, interphalangeal joint. *Equine*  
286 *Vet J* **38**, 170-174  
287
- 288 10. Clayton H.M., Gray S., Kaiser L.J. & Bowker R.M. (2011) Effects of barefoot trimming on hoof morphology.  
289 *Aus Vet J* **89**, 305-311  
290
- 291 11. Hinterhofer C.H., Stanek C.H. & Haider, H. (2000) The effect of flat horseshoes, raised heels and lowered  
292 heels on the biomechanics of the equine hoof assessed by finite element analysis (FEA). *J Vet Med. A,*  
293 *Physiology, Pathology, Clinical Medicine* **47**, 37-82  
294
- 295 12. Bowker R.M., Van Wulfen K.K., Springer S.E., Linder K.E. (1998) Functional anatomy of the cartilage of the  
296 distal phalanx and digital cushion in the equine foot and a hemodynamic flow hypothesis of energy dissipation.  
297 *Am J Vet Res* **59**, 961-968  
298
- 299 13. Darcy P. (2003) The Sports Injury Process. In: *Fundamentals of Sports Injury Management*, 2<sup>nd</sup> edn., Ed:  
300 M.K. Anderson, Lippincott Williams and Wilkins pp 35-40  
301
- 302 14. British Standards Institution. (1975) Precision of test methods 1: Guide for the determination and  
303 reproducibility for a standard test method. *BS 597, Part 1*, London: BSI  
304
- 305 15. Bland J.M. & Altman D.G. (1986) Statistical methods for assessing agreement between two methods of  
306 clinical measurement. *The Lancet* **327**, 307-310  
307
- 308 16. Turner T. (1992) The use of hoof measurements for the objective assessment of hoof balance. *Proc Am*

- 309 *Assoc Equine Prac* **38**, 389-395
- 310
- 311 17. Wilson A., Agass R.F., Sherlock E.C., Vaux S., Day P., Weller R. & Pfau T. (2014) Foot placement of the
- 312 equine forelimb: relationship between foot conformation, foot placement and motion asymmetry. *Equine Vet J*
- 313 (online)
- 314
- 315 18. Agass R.F., Wilson A.M., Sherlock E.C., Vaux S., Day P., Weller R. & Pfau T. (2014) The relationship
- 316 between foot conformation, foot placement and movement symmetry in the equine hind limb at walk and trot.
- 317 *Equine Vet J* **46**, 19-20
- 318
- 319 19. Willemen M.A., Savelberg H.H.C.M. & Barneveld A. (1999) The effect of orthopaedic shoeing on the force
- 320 exerted by the deep digital flexor tendon on the navicular bone in horses. *Equine Vet J* **31**, 25–30
- 321
- 322 20. Day P., Butts D., Pfau T., Pardoe C. & Weller R. (2013) Does hoof deformation differ between horses with
- 323 collapsed heels and horses with non-collapsed heels? *J Equine Vet Sci* **33**, 859
- 324
- 325 21. Balch O.K., Helman R.G. & Collier M.A. (2001) Underrun heels and toe-grab length as possible risk factors
- 326 for catastrophic musculoskeletal injuries in Oklahoma race-horses. *Proc Am Assoc Equine Prac* **47**, 334–338
- 327
- 328 22. Thomason J.J. (1998) Variation in surface strain on the equine hoof wall at the midstep with shoeing, gait,
- 329 substrate, direction of travel, and hoof shape. *Equine Vet J Supp* **26**, 86-95
- 330
- 331 23. Balch O.K., Butler D. & Collier M.A. (1997) Balancing the normal foot: hoof preparation, shoe fit and shoe
- 332 modification in the performance horse. *Equine Vet Educ* **9**, 143-154
- 333
- 334 24. Van Heel M.C.V., Barneveld A., van Weeren P.R. & Back W. (2004) Dynamic pressure measurements for the
- 335 detailed study of hoof balance: the effect of trimming. *Equine Vet J* **36**, 778-782
- 336
- 337 25. Milner P. & Hughes I. (2012) Remedial Farriery Part 5: Principles of foot balance. *Comp Ani* **17**, 10-15
- 338
- 339 26. Hood D.M., Wagner I.P., Taylor D.D., Brumbaugh G.W. & Chaffin M.K. (2001) Voluntary limb load distribution
- 340 in horses with acute and chronic laminitis. *Am J Vet Res* **62**, 1393-1398

341

342 27. Kaneps A.J. & Turner T.A. (2004) Diseases of the Foot. In: *Equine Sports Medicine and Surgery*. Ed: K.W.

343 Hinchcliff, A.J. Kaneps, R.J. Geor. Saunders Elsevier, London. pp 260-288

344

345 28. Chateau H., Degreuerce C., Jerbi H., Crevier-Denoix N., Pourcelot P., Audigie F., Pasqui-Boutard V. &

346 Denoix J. (2002) Three-dimensional kinematics of the equine interphalangeal joints: articular impact of

347 asymmetric bearing. *Vet Res* **33**, 371-382

348

349 29. Clayton H.M. (2011) Hoof Mechanics during Locomotion. In *Care and Rehabilitation of the Equine Foot*. Ed

350 P. Ramey, Hoof Rehabilitation Publishing LLC, p 276

351

352 30. Balch O.K., White K., Butler D. & Metcalf S. (1995) Hoof balance and lameness: improper toe length, hoof

353 angle and mediolateral balance. *Comp Cont Ed Prac Vet* **17**, 1275-1283

354

355 31. Bowker R.M., Brewer A.M., Vex K.B., Guida L.A., Linder K.E., Sonea I.M. & Stinson A.W. (1993) Sensory

356 receptors in the equine foot. *Am J Vet Res* **54**, 1840–1844

357

358 32. J.J., Douglas J.E. & Sears, W. (2001) Morphology of the laminar junction in relation to the shape of the hoof

359 capsule and distal phalanx in adult horses (*Equus caballus*). *Cells Tissues Organs* **168**, 295–311



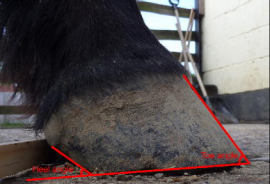

Heel angle

Toe angle

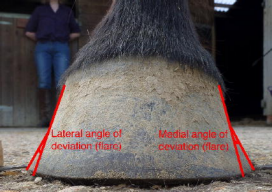

Lateral angle of  
deviation (flare)

Medial angle of  
deviation (flare)

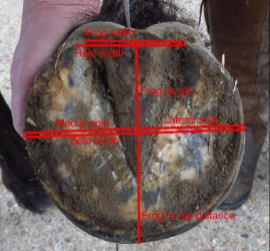

Frog width

Heel width

Frog length

Medial sole

Lateral sole

Sole width

Frog to toe distance
